# Supplementary material for: Psychographic segmentation to identify higher-risk teen peer crowds for health communications: Validation of Virginia's Mindset Lens Survey
Source: Frontiers journal article supplement (doi:10.3389/fpubh.2022.871864), 2022-07-22
Supplement: Data_Sheet_1.pdf [file Data_Sheet_1.pdf]

**Figure S1.** Peer Crowd-Targeted Campaign Examples

| Peer Crowd  | Campaign                                                   | Example Content                                                                                                                                                          |
|-------------|------------------------------------------------------------|--------------------------------------------------------------------------------------------------------------------------------------------------------------------------|
| Hip Hop     | <i>Hustle &amp; Strive</i><br>(substance use;<br>Virginia) |     |
| Alternative | <i>Syke</i><br>(tobacco use;<br>Virginia)                  |   |

| Peer Crowd | Campaign                                                                          | Example Content                                                                                                                                                          |
|------------|-----------------------------------------------------------------------------------|--------------------------------------------------------------------------------------------------------------------------------------------------------------------------|
| Country    | <i>Down &amp; Dirty</i><br>(tobacco use;<br>multiple states)                      |     |
| Mainstream | <i>Y Street, Evolvement</i><br>(youth engagement<br>programs; multiple<br>states) |   |



| Peer Crowd | Campaign                                            | Example Content                                                                                                                                                        |
|------------|-----------------------------------------------------|------------------------------------------------------------------------------------------------------------------------------------------------------------------------|
| Popular    | <i>Behind The Haze</i><br>(vaping; multiple states) |   |
